# Supplementary material for: Topical interventions to prevent acute radiation dermatitis in head and neck cancer patients: a systematic review
Source: Springer Nature journal article supplement (doi:10.1007/s00520-016-3521-7), 2016-12-12
Supplement: MOESM1 [file 11923260]

Appendix 1 - Search Strategy performed in databases CINAHL, COCHRANE CENTRAL, GOOGLE SCHOLAR, LILACS, PUBMED, PROQUEST, SCOPUS, and WEB OF SCIENCE on March 27th, 2016.

CINAHL

| **PICO** | **Search Strategy** | **Results** |
| --- | --- | --- |
|  | Search (S1 and S2 and S3 and S4) | 480 |
| O | TX "radiodermatitis" OR "radiation dermatitis" OR "radio-dermatitis" OR "skin damage" OR "skin toxicity" OR "skin reaction" OR "skin reactions" OR "skin injuries" OR "radiation reaction" OR "acute skin toxicity" OR "acute skin reaction" OR "acute dermatitis" OR "acute radiodermatitis" OR "acute radiation dermatitis" OR "acute radiation reactions" OR "acute radiation-induced skin reactions" OR "radiation-induced acute skin" OR "radiation induced skin injuries" OR "radiation-induced skin reaction" OR "radiation induced dermatitis" OR "radio-induced damage" OR "radiotherapy-induced skin reactions" OR "radiation skin reactions" OR "radiation-induced skin injuries" | 4626 |
| C | TX "standard of care" OR "skin care" OR "soap" OR "soaps" OR "mild soap" OR "pharmaceutical vehicles" OR "sorbolene" OR "placebo" OR "placebos" OR "placebo effect" OR "emollient" OR "emollients" OR "prevention" OR "prophylaxis" OR prophylactic OR washing OR "aqueous cream" OR "based creams" OR "oil-based" OR vehicle OR "usual supportive care" OR "usual care" OR "standard care" OR "standard treatment" OR "non-pharmacological" OR "no medication" OR "no intervention" OR "topical aqueous cream" | 571228 |
| I | TX "administration, topical" OR "ointment" OR "ointments" OR "pastes" OR "unguents" OR "skin cream" OR "skin care" OR "transdermal patch" OR "emulsions" OR "emulsion" OR "powder" OR "powders" OR "pharmaceutical solutions" OR "solutions" OR "prophylaxis" OR "prevention" OR "skin therapy" OR "skin ointment" OR “cream” OR “creme” OR “creams” OR “gel” OR "dressing" OR "dressings" OR “lotion” OR “oil” OR "patch" OR “moisturizer” OR “topical” OR "topical route" OR "topical interventions" OR "topical application" OR "topical ointment" OR "topical agents" OR "topical treatment" OR "topical administration" | 600233 |
| P | TX “head and neck neoplasms” or "carcinoma, squamous cell" or "squamous cell carcinoma" or “head and neck cancer” or “head and neck cancers” or “head and neck tumor” or “head and neck tumors” or “head and neck tumour” or “head and neck tumours” or “head and neck carcinoma” or “head and neck carcinomas” or “head and neck region” or “head and neck squamous cell carcinoma” | 15930 |

Cochrane CENTRAL

| PICO | **Search Strategy** | **Results** |
| --- | --- | --- |
|  | #1 and #2 and #3 and #4 | 72 |
| O | "radiodermatitis" or "dermatitis" or "radiation dermatitis" or "radio-dermatitis" or "skin damage" or "skin toxicity" or "skin reaction" or "skin injuries" or "radiation reaction" or "radio-epithelitis" or "acute skin toxicity" or "acute skin reaction" or "acute dermatitis" or "acute radiodermatitis" or "acute cutaneous toxicity" or "acute radiation dermatitis" or "acute radiation reactions" or "acute radiation-induced skin reactions" or "radiation-induced acute skin" or "radiation induced skin injuries" or "radiation-induced skin reaction" or "radiation induced dermatitis" or "radio-induced damage" or "radiotherapy-induced skin reactions" or "radiation skin reactions" or "radiation-induced skin injuries" in Trials (Word variations have been searched) | 6236 |
| C | "standard of care" or "skin care" or "soap" or "mild soap" or "pharmaceutical vehicles" or "sorbolene" or "placebo" or "placebo effect" or "emollient" or "prevention" or "prophylaxis" or "prophylactic" or "washing" or "aqueous cream" or "based creams" or "oil-based" or "vehicle" or "usual supportive care" or "usual care" or "standard care" or "standard treatment" or "non-pharmacological" or "no medication" or "no intervention" or "topical aqueous cream" in Trials (Word variations have been searched) | 284194 |
| I | "administration, topical" or "ointment" or "pastes" or "unguents" or "skin cream" or "skin care" or "transdermal patch" or "emulsion" or "powder" or "pharmaceutical solutions" or "solutions" or "prophylaxis" or "prevention" or "prevention and control" or "skin therapy" or "skin ointment" or "cream" or "creme" or "gel" or "dressing" or "dressings" or "lotion" or "oil" or "patch" or "moisturizer" or "topical" or "topical route" or "topical interventions" or "topical application" or "topical ointment" or "topical agents" or "topical treatment" or "topical administration" in Trials (Word variations have been searched) | 168867 |
| P | "head and neck neoplasms" or "carcinoma, squamous cell" or "squamous cell carcinoma" or "head and neck cancer" or "head and neck tumor" or "head and neck carcinoma" or "head and neck" or "head and neck region" or "head and neck squamous cell carcinoma" in Trials (Word variations have been searched) | 9211 |

GOOGLE Scholar

|  | **Search Strategy** | **Results** |
| --- | --- | --- |
| All the words | "radiodermatitis" "radiation-induced dermatitis" "radiation dermatitis" | 43 |
| Exact phrase | “head and neck cancer” |
| Without the word | “ultraviolet” |
| Strategy | "head and neck cancer" "radiodermatitis" "radiation-induced dermatitis" "radiation dermatitis" -ultraviolet |

LILACS

| **PICO** | **Search Strategy** | **Results** |
| --- | --- | --- |
| P | Head and Neck Neoplasms OR Neoplasias de Cabeza y Cuello OR Neoplasias de Cabeça e Pescoço | 3 |
| I | - |
| C |
| O | Radiodermatitis OR Radiodermatite |
| (tw:(Head and Neck Neoplasms OR Neoplasias de Cabeza y Cuello OR Neoplasias de Cabeça e Pescoço)) AND (tw:(Radiodermatitis OR Radiodermatite)) | | |

PUBMED

| **PICO** | **Search Strategy** | **Results** |
| --- | --- | --- |
|  | (#1 and #2 and #3 and #4) | 198 |
| O | ("radiodermatitis"[MeSH Terms] OR "dermatitis"[MeSH Terms] OR "radiodermatitis" OR "dermatitis" OR "radiation dermatitis" OR “radioepidermitis” OR "radio-dermatitis" OR "skin damage" OR "skin toxicity" OR "skin reaction" OR "skin reactions" OR "skin injuries" OR "radiation reaction" OR "radio-epithelitis" OR "acute skin toxicity" OR "acute skin reaction" OR "acute dermatitis" OR "acute radiodermatitis" OR "acute cutaneous toxicity" OR "acute radiation dermatitis" OR "acute radiation reactions" OR "acute radiation-induced skin reactions" OR "radiation-induced acute skin" OR "radiation induced skin injuries" OR "radiation-induced skin reaction" OR "radiation induced dermatitis" OR "radio-induced damage" OR "radiotherapy-induced skin reactions" OR "radiation skin reactions" OR "radiation-induced skin injuries") | 114596 |
| C | ("standard of care"[MeSH Terms] OR "skin care"[MeSH Terms] OR "soaps"[MeSH Terms] OR "pharmaceutical vehicles"[MeSH Terms] OR "placebos"[MeSH Terms] OR "placebo effect"[MeSH Terms] OR "emollients"[MeSH Terms] OR "standard of care" OR "skin care" OR "soap" OR "soaps" OR "mild soap" OR "pharmaceutical vehicles" OR "sorbolene" OR "placebo" OR "placebos" OR "placebo effect" OR "emollient" OR "emollients" OR "prevention" OR "prophylaxis" OR “prophylactic” OR “washing” OR "aqueous cream" OR "based creams" OR "oil-based" OR “vehicle” OR "usual supportive care" OR "usual care" OR "standard care" OR "standard treatment" OR "non-pharmacological" OR "no medication" OR "no intervention" OR "topical aqueous cream") | 1803671 |
| I | ("administration, topical"[MeSH Terms] OR "ointments"[MeSH Terms] OR "skin cream"[MeSH Terms] OR "skin care"[MeSH Terms] OR "transdermal patch"[MeSH Terms] OR "emulsions"[MeSH Terms] OR "powders"[MeSH Terms] OR "pharmaceutical solutions"[MeSH Terms] OR "solutions"[MeSH Terms] OR "administration, topical" OR "ointment" OR "ointments" OR "pastes" OR "unguents" OR "skin cream" OR "skin care" OR "transdermal patch" OR "emulsions" OR "emulsion" OR "powder" OR "powders" OR "pharmaceutical solutions" OR "solutions" OR "prophylaxis" OR "prevention" OR "prevention and control" OR "skin therapy" OR "skin ointment" OR “cream” OR “creme” OR “creams” OR “gel” OR "dressing" OR "dressings" OR “lotion” OR “oil” OR "patch" OR “moisturizer” OR “topical” OR "topical route" OR "topical interventions" OR "topical application" OR "topical ointment" OR "topical agents" OR "topical treatment" OR "topical administration") | 2430263 |
| P | ("head and neck neoplasms"[MeSH Terms] OR "carcinoma, squamous cell"[MeSH Terms] OR "head and neck neoplasms" OR "carcinoma, squamous cell" OR "squamous cell carcinoma" OR "head and neck cancer" OR "head and neck cancerology" OR "head and neck cancers" OR "head and neck tumor" OR "head and neck tumoren" OR "head and neck tumors" OR "head and neck tumour" OR "head and neck tumours" OR "head and neck carcinoma" OR "head and neck carcinomas" OR "head and neck" OR "head and neck region" OR "head and neck squamous cell carcinoma") | 385630 |

ProQuest Thesis and Dissertations

|  | **Search Strategy** | **Results** |
| --- | --- | --- |
|  | "radiodermatitis" "radiation-induced dermatitis" "radiation dermatitis" “head and neck cancer” | 1 |

SCOPUS

| **PICO** | **Search Strategy** | **Results** |
| --- | --- | --- |
|  | #1 AND #2 AND #3 AND #4 | 404 |
| O | ["radiodermatitis" OR "radiation dermatitis" OR "radioepidermitis" OR "radio-dermatitis" OR "radiation reaction" OR "radio-epithelitis" OR "acute radio dermatitis" OR "acute radiation dermatitis" OR "acute radiation reactions" OR "acute radiation-induced skin reactions" OR "radiation-induced acute skin" OR "radiation induced skin injuries" OR "radiation-induced skin reaction" OR "radiation induced dermatitis" OR "radio-induced damage" OR "radiotherapy-induced skin reactions" OR "radiation skin reactions" OR "radiation-induced skin injuries"](https://www.scopus.com/search/save/action.url?activity=allAction&userSearchID=13&origin=savedsearch) | 11,447 |
| C | ["standard of care" OR "skin care" OR "soaps" OR "pharmaceutical vehicles" OR "placebos" OR "placebo effect" OR "emollients" OR "standard of care" OR "soap" OR "prevention" OR "prophylaxis" OR " washing" OR "usual care" OR "standard care" OR "standard treatment" OR "non-pharmacological" OR "no medication" OR "no intervention"](https://www.scopus.com/search/save/action.url?activity=allAction&userSearchID=12&origin=savedsearch) | 3,751,223 |
| I | ["administration, topical" OR "skin care" OR "pharmaceutical solutions" OR "prevention" OR "prevention and control" OR "skin therapy" OR "topical interventions" OR "topical application" OR "topical agents" OR "topical treatment" OR "topical administration"](https://www.scopus.com/search/save/action.url?activity=allAction&userSearchID=11&origin=savedsearch) | 2,876,488 |
| P | ["head and neck neoplasms" OR "carcinoma, squamous cell" OR "squamous cell carcinoma" OR "head and neck cancer" OR "head and neck cancers" OR "head and neck tumor" OR "head and neck tumors" OR "head and neck tumour" OR "head and neck tumours" OR "head and neck carcinoma" OR "head and neck carcinomas" OR "head and neck" OR "head and neck region" OR "head and neck squamous cell carcinoma"](https://www.scopus.com/search/save/action.url?activity=allAction&userSearchID=10&origin=savedsearch) | 678,297 |

WEB OF SCIENCE

| **PICO** | **Search Strategy** | **Results** |
| --- | --- | --- |
|  | #4 AND #3 AND #2 AND #1  Index=SCI-EXPANDED, SSCI, A&HCI, CPCI-S, CPCI-SSH Time range=All years | 100 |
| O | Topic: ("radiodermatitis" OR "dermatitis" OR "radiation dermatitis" OR “radioepidermitis” OR "radio-dermatitis" OR "skin damage" OR "skin toxicity" OR "skin reaction" OR "skin reactions" OR "skin injuries" OR "radiation reaction" OR "radio-epithelitis" OR "acute skin toxicity" OR "acute skin reaction" OR "acute dermatitis" OR "acute radiodermatitis" OR "acute cutaneous toxicity" OR "acute radiation dermatitis" OR "acute radiation reactions" OR "acute radiation-induced skin reactions" OR "radiation-induced acute skin" OR "radiation induced skin injuries" OR "radiation-induced skin reaction" OR "radiation induced dermatitis" OR "radio-induced damage" OR "radiotherapy-induced skin reactions" OR "radiation skin reactions" OR "radiation-induced skin injuries") | 67226 |
| C | Topic: ("standard of care" OR "skin care" OR "soap" OR "soaps" OR "mild soap" OR "pharmaceutical vehicles" OR "sorbolene" OR "placebo" OR "placebos" OR "placebo effect" OR "emollient" OR "emollients" OR "prevention" OR "prophylaxis" OR “prophylactic” OR “washing” OR "aqueous cream" OR "based creams" OR "oil-based" OR “vehicle” OR "usual supportive care" OR "usual care" OR "standard care" OR "standard treatment" OR "non-pharmacological" OR "no medication" OR "no intervention" OR "topical aqueous cream") | 1045602 |
| I | Topic: ("administration, topical" OR "ointment" OR "ointments" OR "pastes" OR "unguents" OR "skin cream" OR "skin care" OR "transdermal patch" OR "emulsions" OR "emulsion" OR "powder" OR "powders" OR "pharmaceutical solutions" OR "solutions" OR "prophylaxis" OR "prevention" OR "prevention and control" OR "skin therapy" OR "skin ointment" OR “cream” OR “creme” OR “creams” OR “gel” OR "dressing" OR "dressings" OR “lotion” OR “oil” OR "patch" OR “moisturizer” OR “topical” OR "topical route" OR "topical interventions" OR "topical application" OR "topical ointment" OR "topical agents" OR "topical treatment" OR "topical administration") | 2790798 |
| P | Topic: (“head and neck neoplasms” or "carcinoma, squamous cell" or "squamous cell carcinoma" or “head and neck cancer” or “head and neck cancers” or “head and neck tumor” or “head and neck tumors” or “head and neck tumour” or “head and neck tumours” or “head and neck carcinoma” or “head and neck carcinomas” or "head and neck" or “head and neck region” or “head and neck squamous cell carcinoma”) | 121813 |
